# Supplementary material for: Progression of Hepatic Adenoma to Carcinoma in Ogg1 Mutant Mice Induced by Phenobarbital
Source: Oxid Med Cell Longev. 2017 Jul 13;2017:8541064. doi: 10.1155/2017/8541064 (PMC5530452; doi:10.1155/2017/8541064)
Supplement: Supplementary file 1 — Table S1. Canonical pathways analysis by IPA in the livers and liver tumors of control and PB-treated Ogg1−/− and Ogg1+/+ mice. Table S2. Altered biofunctions in the livers and liver tumors of control and PB-treated Ogg1−/− and Ogg1+/+ mice. Table S3. Upstream regulator analysis by IPA in the livers and liver tumors of control and PB-treated Ogg1−/− and Ogg1+/+ mice. [file 8541064.f1.xlsx]

## Sheet: Лист1
Table S1. Canonical pathways analysis by IPA in the livers and liver tumors of control and PB-treated Ogg1-/- and Ogg1+/+ mice.
Ingenuity Canonical Pathways	AnalysisName	-log(p-value)	Ratio	z-score	Molecules
NRF2-mediated Oxidative Stress Response	Control liver Ogg1-/- vs Control liver Ogg1+/+	2.07	0.0155	N/A	Gstm3,GSTP1,PRDX1
NRF2-mediated Oxidative Stress Response	PB-treated liver Ogg1-/- vs Control liver Ogg1-/-	4.83	0.0415	N/A	GSTM1,CBR1,GSTM5,Gstm3,SOD1,AKR1A1,MGST1,PRDX1
NRF2-mediated Oxidative Stress Response	PB-treated liver Ogg1+/+vs Control liver Ogg1+/+	5.98	0.0466	2	GSTA3,GSTM1,CBR1,GSTM5,Gstm3,TXN,AKR1A1,GSTP1,PRDX1
NRF2-mediated Oxidative Stress Response	HCC Ogg1-/- vs Control liver Ogg1-/-	3.29	0.0363	N/A	GSTM1,CBR1,FMO1,SOD1,GSTP1,GSTK1,MGST1
NRF2-mediated Oxidative Stress Response	HCA Ogg1+/+ vs Control liver Ogg1+/+	5.7	0.0466	2	GSTA3,GSTM1,CBR1,GSTM5,Gstm3,TXN,FMO1,SOD1,GSTP1
LXR/RXR Activation	Control liver Ogg1-/- vs Control liver Ogg1+/+	3.08	0.0331	N/A	FASN,SERPINA1,APOE,ECHS1
LXR/RXR Activation	PB-treated liver Ogg1-/- vs Control liver Ogg1-/-	5.08	0.0496	2	PON1,TF,FASN,SERPINA1,HADH,ALB
LXR/RXR Activation	PB-treated liver Ogg1+/+vs Control liver Ogg1+/+	4.34	0.0496	2.236	SAA1,TF,VTN,CLU,HADH,APOE
LXR/RXR Activation	HCC Ogg1-/- vs Control liver Ogg1-/-	1.91	0.0331	-2	TF,SERPINA1,APOE,ALB
LXR/RXR Activation	Adenoma Ogg1+/+ vs Control liver Ogg1+/+	2.65	0.0413	N/A	TF,FASN,HADH,APOE,ALB
