# Supplementary material for: Progression of Hepatic Adenoma to Carcinoma in Ogg1 Mutant Mice Induced by Phenobarbital
Source: Oxid Med Cell Longev. 2017 Jul 13;2017:8541064. doi: 10.1155/2017/8541064 (PMC5530452; doi:10.1155/2017/8541064)
Supplement: Supplementary file 2 [file 8541064.f2.xlsx]

## Sheet: Лист1
Table S2. Altered biofunctions in the livers and liver tumors of control and PB-treated Ogg1-/- and Ogg1+/+ mice.
Diseases and Bio Functions	Control liver Ogg1-/- vs Control liver Ogg1+/+	PB-treated liver Ogg1-/- vs Control liver Ogg1-/-	PB-treated liver Ogg1+/+ vs Control liver Ogg1+/+	HCC Ogg1-/- vs Control liver Ogg1-/-	HCA Ogg1+/+ vs Control liver Ogg1+/+
inflammation of liver	1.48732	2.01862	0.414668	-2.27123	-0.0959015
metabolism of retinoid	0	2.31772	0	2.59362	0
metabolism of terpenoid	-0.256869	1.72769	2.72679	2.68601	2.55146
hepatic steatosis	0.607851	2.72995	0.936196	-2.69706	-1.18709
concentration of fatty acid	0.310446	2.02283	1.76984	0.273368	-1.03764
synthesis of lipid	-1.88803	1.36006	1.36253	1.50949	2.09525
oxidation of lipid	-0.419982	0.224724	0.18244	2.71674	2.23696
steroid metabolism	-0.5547	0.432013	1.93048	1.3109	2.09823
transport of sterol	0.557548	2	1.35381	0	0
biosynthesis of hydrogen peroxide	0	-0.970725	-0.778307	1.71957	0.693375
synthesis of reactive oxygen species	0.630007	0.492301	0.0537492	2.00482	-0.62888
© 2000-2016 QIAGEN. All rights reserved.
