# Supplementary material for: Progression of Hepatic Adenoma to Carcinoma in Ogg1 Mutant Mice Induced by Phenobarbital
Source: Oxid Med Cell Longev. 2017 Jul 13;2017:8541064. doi: 10.1155/2017/8541064 (PMC5530452; doi:10.1155/2017/8541064)
Supplement: Supplementary file 3 [file 8541064.f3.xlsx]

## Sheet: Лист1
	Table S3. Upstream regulator analysis by IPA in the livers and liver tumors of control and PB-treated Ogg1-/- and Ogg1+/+ mice.
Upstream regulators	Control liver Ogg1-/- vs Control liver Ogg1+/+	p-value of overlap	Altered molecles	PB-treated liver Ogg1-/- vs Control liver Ogg1-/-	p-value of overlap	Altered molecles	PB-treated liver Ogg1+/+ vs Control liver Ogg1+/+	p-value of overlap	Altered molecles	HCC Ogg1-/- vs Control liver Ogg1-/-	p-value of overlap	Altered molecles	HCA Ogg1+/+ vs Control liver Ogg1+/+	p-value of overlap	Altered molecles
NR1I2 (PXR)	1.55128	1.61e-15	BHMT,CES1,CYP1A2,CYP2B10,FASN,GLUL,Gstm3,GSTP1,HMGCS2,Mup1,Uox	2.93387	2.16e-27	AHCY,ALDH1A1,BHMT,CES1,CTH,CYP1A2,CYP2A5,CYP2B10,CYP3A11,ENTPD5,FASN,GLUD1,Gsta4,GSTM1,Gstm3,GSTM5,HMGCS2,MGST1,Mup1,POR,TF,Uox	3.30063	6.96e-28	AHCY,ALDH1A1,BHMT,CES1,CYP1A2,CYP2A5,CYP2B10,CYP3A11,GLUD1,GLUL,Gsta4,GSTM1,Gstm3,GSTM5,GSTP1,HMGCS2,Mup1,POR,TF,Uox	0.592751	5.98e-19	AHCY,BHMT,CES1,CTH,CYP1A2,CYP2B10,FASN,GLUD1,GLUL,Gsta4,GSTM1,GSTP1,HMGCS2,MGST1,Mup1,POR,TF,Uox	1.43295	1.42e-24	AHCY,ALDH1A1,BHMT,CTH,CYP1A2,CYP2A5,ENTPD5,FASN,GLUL,Gsta4,GSTM1,Gstm3,GSTM5,GSTP1,HMGCS2,MGST1,MT-CO2,Mup1,PIPOX,POR,TF,Uox
NR1I3 (CAR)	-0.333621	3.16e-05	CYP1A2,CYP2B10,Gstm3,GSTP1	2.64931	2.03e-14	ALDH1A1,CYP1A2,CYP2A5,CYP3A11,Gsta4,GSTM1,Gstm3,GSTM5,PCK1,POR,UGT2B38	2.10272	2.64e-16	ALDH1A1,CYP1A2,CYP2A5,CYP2B10,CYP3A11,Gsta4,GSTM1,Gstm3,GSTM5,GSTP1,POR,UGT2B38	1.59427	2.04e-11	ALDH1A1,CYP1A2,CYP2B10,CYP2F1,CYP3A11,Gsta4,GSTM1,GSTP1,POR,Sult1a1,UGT2B38	1.08815	1.64e-12	ALDH1A1,CYP1A2,CYP2A5,CYP2F1,Gsta4,GSTM1,Gstm3,GSTM5,GSTP1,POR,UGT2B38
NFE2L2 (Nrf2)	-0.821461	5.7e-05	BHMT,Gstm3,GSTP1,PRDX1,SEC23A,Uox	1.68055	5.68e-17	AKR1A1,ATP1A1,BHMT,CREG1,ENTPD5,ESD,FABP1,Gsta4,GSTM1,Gstm3,GSTM5,MGST1,OAT,PDIA3,PRDX1,SOD1,UGDH,UGT2B38,Uox	2.50613	1.12e-18	AKR1A1,BHMT,CBR1,CTSD,FABP1,GSTA3,Gsta4,GSTM1,Gstm3,GSTM5,GSTP1,OAT,PDIA3,PRDX1,PSMD11,SAA1,SERPINA3,TMED2,TXN,UGDH,UGT2B38,Uox	-0.182392	1e-13	ACSL5,BHMT,CBR1,CTSD,FMO1,Gsta4,GSTM1,GSTP1,HSP90B1,INMT,MGST1,OAT,PDIA3,PDIA6,SERPINA3,SOD1,TMED2,UGDH,UGT2B38,Uox	2.04184	2.49e-13	BHMT,CBR1,ENTPD5,FABP1,FMO1,GSTA3,Gsta4,GSTM1,Gstm3,GSTM5,GSTP1,OAT,PDIA3,SOD1,TXN,UGDH,UGT2B38,Uox
CTNNB1	-1.807	1.55e-07	ACTR3,CA3,CYP1A2,CYP2A5,EGFR,GLUL,LAP3,Mup1,NUDT7,RGN,SERPINA1	1.24283	0.000756	ALDH1A1,CA3,CYB5A,CYP1A2,CYP2A5,Mup1,OAT,SERPINA1,VIM	0.212476	1.47e-08	ACTR3,ALDH1A1,CA3,CYB5A,CYP1A2,CYP2A5,CYP2E1,GLUL,LAP3,Mup1,NUDT7,OAT,RGN,SAA1,SERPINA3	2.779	3.03e-05	ALDH1A1,CA3,CYB5A,CYP1A2,CYP2E1,GLUL,IGHM,Mup1,NUDT7,OAT,RGN,SERPINA1,SERPINA3	1.02208	2.84e-05	ALDH1A1,CA3,CYB5A,CYP1A2,CYP2A5,CYP2E1,GLUL,LAP3,Mup1,NDRG2,NUDT7,OAT,RGN
RICTOR	1	0.00969	ATP5D,RPL10A,RPS10,RPS2	0.707107	6.87e-05	Cox6c,NDUFAB1,PSME1,RPL4,RPL7,RPLP2,Rps3a1,UQCR10	1.414	4.78e-05	ATP5A1,ATP5B,ATP5D,ATP5G3,ATP5H,NDUFAB1,PSMD11,PSME1	3.162	1.48e-05	ATP5A1,ATP5B,ATP5C1,ATP5D,ATP5F1,ATP5H,ATP5O,CYC1,RPL10A,RPS2	2.153	5.26e-12	ATP5A1,ATP5B,ATP5C1,ATP5F1,ATP5H,ATP5O,CYC1,NDUFAB1,NDUFS3,PPA1,RPL12,UQCRB,UQCRC2
© 2000-2016 QIAGEN. All rights reserved.

## Sheet: ZBT20
IPA Gene View: ZBTB20 (Mammalian) > Interaction Network	Provide Feedback | Live Support
	Review the categorized literature findings and database information for this node.
		Summary		Human		Mouse		Rat
Entrez Gene Name:	zinc finger and BTB domain containing 20
Synonym(s):	1300017A20Rik, 7330412A13RIK, A930017C21Rik, D16Wsu73e, DKFZp566F123, DPZF, HOF, LOC102723469, Oda8, ODA-8S, PRIMS, RGD1560387, Zfp288, zinc finger and BTB domain containing 20, ZNF288
NCBI CDD Domains (Superfamilies / Multi-Domains):	Broad-Complex, Tramtrack and Bric a brac, BTB/POZ domain, zinc finger, Zinc finger, C2H2 type, Zinc-finger double domain
Protein Functions / Functional Domains:	DNA binding, RNA polymerase II core promoter proximal region sequence-specific binding transcriptional repressor activity, transcription regulator, zinc finger domain
Subcellular Location:	interchromatin granule clusters, nucleoplasm, Nucleus
Canonical Pathway:	--
Targeted By miRNA Functional Cluster:	miR-1245b-5p (and other miRNAs w/seed AGGCCUU), miR-125b-2-3p (and other miRNAs w/seed CACAAGU), miR-1260a (and other miRNAs w/seed UCCCACC), miR-1273e (miRNAs w/seed UGCUUGA), miR-1273g-3p (miRNAs w/seed CCACUGC), miR-129-1-3p (and other miRNAs w/seed AGCCCUU), miR-129-5p (miRNAs w/seed UUUUUGC), miR-142-3p (and other miRNAs w/seed GUAGUGU), miR-181a-2-3p (and other miRNAs w/seed CCACUGA), miR-1…
(showing 50 out of 70)
show all
Top findings from Ingenuity Knowledge Base (show all 346 categorized literature findings)
regulates:	glycogen, Ins1, LEP, NFKBIA, glucagon, blood urea nitrogen, Alp, K+, ketone body, bilirubin, Cpt, GSTM4, GSTM5, Cyp2c54 (includes others), CYP1A2
regulated by:	IRF4, PRDM1, beta-estradiol, Tlr, SBDS, SUMO1
binds:	IQGAP1, FLNA, MYH9, ANLN, CALML3, LIMA1, MYO19, SYNPO, ZBTB45, HSP90AB1, SUMO3, CHD7, CDC37, NR3C1, PPARG
role in cell:	transcription in, activation in, expression in, production in, cell cycle progression, survival, growth
disease:	Primrose syndrome, growth failure, hypoglycemia, hereditary disorder, sepsis, endotoxin shock response, breast cancer
Isoforms From
More Info
ZBTB20Chromosome: 3;Location: 3q13.31DomainsBTBzf-H2C2_2zf-C2H2ZnF_C2H2Length(# of AA's)ZBTB20 variant 1 | ZBTB20 isof...741ZBTB20 variant 2 | ZBTB20 isof...668ZBTB20 variant 3 | ZBTB20 isof...668ZBTB20 variant 4 | ZBTB20 isof...668ZBTB20 variant 5 | ZBTB20 isof...668ZBTB20 variant 6 | ZBTB20 isof...668ZBTB20 variant 7 | ZBTB20 isof...668ZBTB20 variant 8
GO Annotations
Molecular Function:	DNA binding; metal ion binding; nucleic acid binding; RNA polymerase II core promoter proximal region sequence-specific DNA binding transcription factor activity involved in negative regulation of transcription
Biological Process:	negative regulation of gene expression; negative regulation of transcription, DNA-dependent; negative regulation of transcription from RNA polymerase II promoter; positive regulation of interferon-beta production; positive regulation of interleukin-6 production; positive regulation of tumor necrosis factor production; regulation of transcription, DNA-dependent; transcription, DNA-dependent
Cellular Component:	nucleoplasm; nucleus
Functional Roles
Molecular Processes
expression of (44)	ACSS2, ADH4, AKT1, ATF2, Akr1b7, CISH, CYP1A2, CYP2B6, CYP2C8, CYP2F1, CYP3A5, Cpt, Cyp2b13/Cyp2b9, Cyp2c54 (includes others), FASN, G6PC, GAS6, GCGR, GCK, GHR, GPC3, GSTM4, GSTM5, IGF1, IGFALS, IGFBP1, IGFBP2, IRS1, LDHB, LEPR, NEDD9, NFKBIA, NR3C1, PCK1, PDK4, PPARGC1A, Pyruvate kinase, SOCS2, SOCS3, UGDH, UGT2B17, aldo, p85, RNA, gene
quantity of (15)	3-hydroxybutyric acid, D-glucose, bilirubin, glycogen, Alp, Ins1, K+, LEP, aspartate transaminase, bilirubin, blood urea nitrogen, glucagon, glycogen, ketone body
production of (12)	IFNB1, IL6, TNF, IL6, Interferon Beta, TNF
localization of (5)	GPT, Gcg, Ins1, LEP, RETN
transcription of (3)	NFKBIA, DNA, DNA endogenous promoter, DNA promoter, RNA
activation of (2)	RELA
homeostasis of (1)	glycogen
metabolism of (1)	D-glucose
transcription by (1)	RNA polymerase II
Cellular Processes
production in (9)	bone marrow-derived macrophages, peritoneal macrophages
activation in (2)	macrophages, nucleus
expression in (1)	macrophages
transcription in (1)	macrophages
Organismal Processes
expression in (42)	liver
growth of (3)	mouse
homeostasis in (2)	mouse
organismal death of (2)	mouse
development in (1)	mouse
development of (1)	hippocampus
dysfunction in (1)	mouse
glucose tolerance of (1)	mouse
homeostasis of (1)	blood
insulin sensitivity index of (1)	mouse
lifespan of (1)	mouse
mass of (1)	body
metabolism in (1)	mouse
survival of (1)	mouse
Back to top >>
Mutant Information
homozygous (82)	dysfunction, expression, glucose tolerance, growth, hypoglycemia, insulin sensitivity index, lifespan, localization, metabolism, quantity, survival, development, glucose tolerance, growth failure, homeostasis, hypoglycemia, insulin sensitivity, mass, organismal death, quantity
gene knockout (11)	activation, endotoxin shock response, expression, production, sepsis
Back to top >>
Modifications and Regulation
expression regulated by (2)	IRF4, PRDM1
binding regulated by (1)	Tlr
sumoylation regulated by (1)	SUMO1
Back to top >>
Disease
Positive (5)	endotoxin shock response, hypoglycemia, sepsis, growth failure, hypoglycemia
Back to top >>
Expression and Localization
Biofluid
Positive (3)	Blood
Cell or Tissue Expression
Positive (84)	Ammon's horn, CA1 neuron, anlage, bone marrow cell lines, brain, cells, cerebellum, cortical plate, dentate gyrus, external granule cell layer, germinal center B lymphocytes, glomerular layer of olfactory bulb, granule cell layer, granule cells, granule neuron progenitor cells, hematopoietic cell lines, hilus of dentate gyrus, hippocampal CA1 region, hippocampal CA3 region, hippocampal plate, hip…
Negative (8)	astrocytes, cells, cerebellum, cerebral cortex cells, cerebral neocortex, cortical plate, fornix, granule cell layer, midtemporal gyrus, stem cells, subventricular zone, white matter
Subcellular Location
Positive (8)	interchromatin granule clusters, nucleus
Back to top >>
Physical Interactions
Protein-Protein
Positive (1)	CHD7
Protein-Nucleic Acid
Positive (3)	IRF4, NFKBIA
Back to top >>
Toxicology
Assays: Clinical Chemistry and Hematology
quantity (4)	bilirubin, K+, bilirubin, blood urea nitrogen
Back to top >>
Isoform Specific Findings
protein
Zbtb20 isoform L (4)	binding, expression
Zbtb20 isoform S (2)	expression
